# Supplementary material
Source: HighWire-hosted journal article supplement (https://erj.ersjournals.com/content/58/6/2102241)
Supplement: inline-supplementary-material-1 [file inline-supplementary-material-1.pdf]

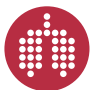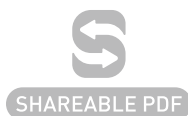

# Soluble VE-cadherin: not just a marker of endothelial permeability

Shi Qi Li<sup>1,2,3</sup>, Ying Ni Lin<sup>1,2,3</sup> and Qing Yun Li<sup>1,2</sup>

<sup>1</sup>Dept of Respiratory and Critical Care Medicine, Ruijin Hospital, Shanghai Jiao Tong University School of Medicine, Shanghai, China. <sup>2</sup>Institute of Respiratory Medicine, Shanghai Jiao Tong University School of Medicine, Shanghai, China. <sup>3</sup>Co-first author.

Corresponding author: Qing Yun Li ([liqingyun68@hotmail.com](mailto:liqingyun68@hotmail.com))

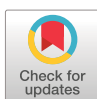

Shareable abstract (@ERSpublications)

**Serum soluble VE-cadherin holds a promise as a marker of endothelial permeability; further investigations are still needed to confirm the sensitivity and specificity, and extend the existing findings** <https://bit.ly/2WujSCc>

**Cite this article as:** Li SQ, Lin YN, Li QY. Soluble VE-cadherin: not just a marker of endothelial permeability. *Eur Respir J* 2021; 58: 2102241 [DOI: 10.1183/13993003.02241-2021].

This single-page version can be shared freely online.

Copyright ©The authors 2021.  
For reproduction rights and  
permissions contact  
[permissions@ersnet.org](mailto:permissions@ersnet.org)

Received: 13 Aug 2021  
Accepted: 19 Aug 2021

*To the Editor:*

Recently, the publication by HARKI *et al.* [1] in the *European Respiratory Journal* reported higher levels of serum soluble VE-cadherin (sVE) in volunteers exposed to intermittent hypoxia (IH), as well as in patients with obstructive sleep apnoea (OSA). They further demonstrated that IH induced VE-cadherin cleavage through reactive oxygen species production and activation of HIF-1, VEGF and tyrosine kinase pathway, indicating that serum sVE could be a promising biomarker of increased endothelial permeability in OSA patients. The results are meaningful since there is, as yet, no endothelium-specific biomarker for the early diagnosis of endothelial barrier disruption in OSA patients. However, it is worth noting that sVE may not be just a marker of endothelial permeability.
